# Supplementary material for: Genetics of H5N1 and H5N8 High-Pathogenicity Avian Influenza Viruses Isolated in Japan in Winter 2021–2022
Source: MDPI journal article supplement (doi:10.3390/v16030358), 2024-02-26
Supplement: s1 [file s1]

**Table S1.** Information of H5 AIVs detected in Japan in 2021–2022.

| Genotype | Collection date | Host                | Prefecture | Area     | Subtype | Representative isolate <sup>a</sup>                            | Accession No.              |
|----------|-----------------|---------------------|------------|----------|---------|----------------------------------------------------------------|----------------------------|
| G2a      | 8/11/2021       | water               | Kagoshima  | Kyushu   | H5      | <a href="#">A/environment/Kagoshima/KU-ngrB4/2021</a>          | <a href="#">EPI1933367</a> |
| G2b      | 9/11/2021       | fece                | Miyazaki   | Kyushu   | H5N1    | <a href="#">A/teal/Miyazaki/211109-32/2021</a>                 | <a href="#">EPI2200549</a> |
| G2a      | 19/11/2021      | hooded crane        | Kagoshima  | Kyushu   | H5N8    | <a href="#">A/hooded crane/Kagoshima/KU-5T/2021</a>            | <a href="#">EPI1933371</a> |
| G2a      | 22/11/2021      | water               | Kagoshima  | Kyushu   | H5N8    | <a href="#">A/environment/Kagoshima/KU-1a/2021</a>             | <a href="#">EPI2552897</a> |
| G2a      | 22/11/2021      | water               | Kagoshima  | Kyushu   | H5N8    | <a href="#">A/environment/Kagoshima/KU-3a/2021</a>             | <a href="#">EPI2552905</a> |
| G2a      | 29/11/2021      | water               | Kagoshima  | Kyushu   | H5N8    | <a href="#">A/environment/Kagoshima/KU-H3/2021</a>             | <a href="#">EPI2553056</a> |
| G2a      | 1/12/2021       | water               | Tottori    | Western  | H5      | <a href="#">A/water/Tottori/NK1201-2/2021</a>                  | <a href="#">EPI2136330</a> |
| G2a      | 6/12/2021       | water               | Kagoshima  | Kyushu   | H5N8    | <a href="#">A/environment/Kagoshima/KU-D7/2021</a>             | <a href="#">EPI2553072</a> |
| G2b      | 20/12/2021      | water               | Kagoshima  | Kyushu   | H5N1    | <a href="#">A/environment/Kagoshima/KU-B20/2021</a>            | <a href="#">EPI2553152</a> |
| G2d      | 2/1/2022        | White-tailed eagle  | Hokkaido   | Hokkaido | H5N1    | <a href="#">A/white-tailed eagle/Hokkaido/22-RU-WTE-2/2022</a> | <a href="#">EPI1999383</a> |
| G2a      | 10/1/2022       | water               | Kagoshima  | Kyushu   | H5N8    | <a href="#">A/environment/Kagoshima/KU-D8/2022</a>             | <a href="#">EPI2553168</a> |
| G2d      | 20/1/2022       | jungle crow         | Hokkaido   | Hokkaido | H5N1    | <a href="#">A/crow/Hokkaido/0101Q045/2022</a>                  | <a href="#">EPI2109830</a> |
|          | 22/1/2022       | Steller's sea eagle | Hokkaido   | Hokkaido | H5      |                                                                |                            |
|          | 23/1/2022       | jungle crow         | Hokkaido   | Hokkaido | H5N1    |                                                                |                            |
|          | 23/1/2022       | White-tailed eagle  | Hokkaido   | Hokkaido | H5      |                                                                |                            |
| G2b      | 27/1/2022       | eastern buzzard     | Kyoto      | Western  | H5N1    | <a href="#">A/common buzzard/Japan/2601B013/2022</a>           | <a href="#">EPI2362660</a> |
|          | 28/1/2022       | jungle crow         | Hokkaido   | Hokkaido | H5N1    |                                                                |                            |
|          | 2/2/2022        | White-tailed eagle  | Hokkaido   | Hokkaido | H5      |                                                                |                            |
| G2d      | 3/2/2022        | jungle crow         | Hokkaido   | Hokkaido | H5N1    | <a href="#">A/crow/Hokkaido/0101Q054/2022</a>                  | <a href="#">EPI2109843</a> |
| G2d      | 7/2/2022        | jungle crow         | Hokkaido   | Hokkaido | H5N1    | <a href="#">A/crow/Hokkaido/0102F043/2022</a>                  | <a href="#">EPI2109867</a> |
| G2d      | 8/2/2022        | jungle crow         | Hokkaido   | Hokkaido | H5N1    | <a href="#">A/crow/Hokkaido/0101Q056/2022</a>                  | <a href="#">EPI2133494</a> |
| G2d      | 8/2/2022        | jungle crow         | Hokkaido   | Hokkaido | H5N1    | <a href="#">A/crow/Hokkaido/0102F048/2022</a>                  | <a href="#">EPI2109859</a> |
| G2d      | 8/2/2022        | jungle crow         | Hokkaido   | Hokkaido | H5N1    | <a href="#">A/crow/Hokkaido/0102M086/2022</a>                  | <a href="#">EPI2109915</a> |
| G2d      | 8/2/2022        | whooper swan        | Iwate      | Northern | H5N1    | <a href="#">A/swan/Japan/0302I001T/2022</a>                    | <a href="#">EPI2362739</a> |
| G2d      | 10/2/2022       | White-tailed eagle  | Hokkaido   | Hokkaido | H5N1    | <a href="#">A/white-tailed eagle/Hokkaido/20220210001/2022</a> | <a href="#">EPI2109935</a> |
|          | 11/2/2022       | jungle crow         | Iwate      | Northern | H5N1    |                                                                |                            |
| G2d      | 12/2/2022       | white-fronted goose | Iwate      | Northern | H5N1    | <a href="#">A/white-fronted goose/Japan/TU16-74/2022</a>       | <a href="#">EPI2362860</a> |
|          | 13/2/2022       | jungle crow         | Iwate      | Northern | H5N1    |                                                                |                            |
| G2d      | 14/2/2022       | jungle crow         | Hokkaido   | Hokkaido | H5N1    | <a href="#">A/crow/Hokkaido/0101Q061/2022</a>                  | <a href="#">EPI2132986</a> |
| G2d      | 14/2/2022       | jungle crow         | Hokkaido   | Hokkaido | H5N1    | <a href="#">A/crow/Hokkaido/0102L010/2022</a>                  | <a href="#">EPI2109907</a> |
|          | 14/2/2022       | whooper swan        | Iwate      | Northern | H5N1    |                                                                |                            |
|          | 15/2/2022       | jungle crow         | Hokkaido   | Hokkaido | H5N1    |                                                                |                            |
|          | 15/2/2022       | whooper swan        | Iwate      | Northern | H5N1    |                                                                |                            |
|          | 15/2/2022       | whooper swan        | Iwate      | Northern | H5N1    |                                                                |                            |

|     |           |                     |           |          |      |                                                |             |
|-----|-----------|---------------------|-----------|----------|------|------------------------------------------------|-------------|
|     | 16/2/2022 | whooper swan        | Iwate     | Northern | H5N1 |                                                |             |
|     | 17/2/2022 | whooper swan        | Iwate     | Northern | H5N1 |                                                |             |
|     | 17/2/2022 | jungle crow         | Iwate     | Northern | H5N1 |                                                |             |
| G2d | 18/2/2022 | jungle crow         | Hokkaido  | Hokkaido | H5N1 | A/jungle_crow/Hokkaido/0102Q065T/2022          | EPI18720834 |
| G2b | 18/2/2022 | mallard             | Fukushima | Northern | H5N1 | A/duck/Japan/0702A001/2022                     | EPI2200565  |
| G2d | 19/2/2022 | jungle crow         | Hokkaido  | Hokkaido | H5N1 | A/jungle_crow/Hokkaido/0102Q068T/2022          | EPI18720840 |
|     | 21/2/2022 | jungle crow         | Iwate     | Northern | H5N1 |                                                |             |
| G2d | 21/2/2022 | whooper swan        | Iwate     | Northern | H5N1 | A/whooper swan/Iwate/0302I010/2022             | EPI2200567  |
|     | 22/2/2022 | jungle crow         | Iwate     | Northern | H5N1 |                                                |             |
|     | 22/2/2022 | whooper swan        | Iwate     | Northern | H5N1 |                                                |             |
| G2d | 24/2/2022 | jungle crow         | Hokkaido  | Hokkaido | H5N1 | A/jungle_crow/Hokkaido/0102Q071T/2022          | EPI18720846 |
|     | 24/2/2022 | eastern buzzard     | Iwate     | Northern | H5N1 |                                                |             |
|     | 24/2/2022 | jungle crow         | Iwate     | Northern | H5N1 |                                                |             |
|     | 25/2/2022 | black kite          | Iwate     | Northern | H5N1 |                                                |             |
|     | 28/2/2022 | Spot-billed duck    | Iwate     | Northern | H5   |                                                |             |
| G2d | 1/3/2022  | jungle crow         | Hokkaido  | Hokkaido | H5N1 | A/jungle_crow/Hokkaido/0103Q074T/2022          | EPI18720853 |
|     | 1/3/2022  | jungle crow         | Iwate     | Northern | H5N1 |                                                |             |
| G2d | 1/3/2022  | jungle crow         | Hokkaido  | Hokkaido | H5N1 | A/crow/Hokkaido/0102L015/2022                  | EPI2133478  |
|     | 3/3/2022  | White-tailed eagle  | Hokkaido  | Hokkaido | H5   |                                                |             |
| G2d | 4/3/2022  | jungle crow         | Iwate     | Northern | H5N1 | A/jungle crow/Japan/0303I003/2022              | EPI2362942  |
|     | 8/3/2022  | Steller's sea eagle | Hokkaido  | Hokkaido | H5   |                                                |             |
| G2d | 9/3/2022  | jungle crow         | Hokkaido  | Hokkaido | H5N1 | A/jungle crow/Hokkaido/0103Q075T/2022          | EPI18720851 |
| G2d | 14/3/2022 | jungle crow         | Hokkaido  | Hokkaido | H5N1 | A/crow/Hokkaido/0103L018/2022                  | EPI2133486  |
| G2d | 14/3/2022 | jungle crow         | Hokkaido  | Hokkaido | H5N1 | A/jungle_crow/Hokkaido/0103Q079T/2022          | EPI18720858 |
| G2d | 14/3/2022 | jungle crow         | Hokkaido  | Hokkaido | H5N1 | A/jungle_crow/Hokkaido/0103Q080T/2022          | EPI18720859 |
|     | 14/3/2022 | jungle crow         | Iwate     | Northern | H5N1 |                                                |             |
| G2d | 18/3/2022 | whooper swan        | Iwate     | Northern | H5N1 | A/swan/Japan/0303B006/2022                     | EPI2363028  |
| G2d | 22/3/2022 | White-tailed eagle  | Hokkaido  | Hokkaido | H5   | A/white-tailed eagle/Hokkaido/20220322001/2022 | EPI2200570  |
|     | 23/3/2022 | jungle crow         | Iwate     | Northern | H5N1 |                                                |             |
| G2d | 24/3/2022 | White-tailed eagle  | Hokkaido  | Hokkaido | H5   | A/white-tailed eagle/Hokkaido/20220324001/2022 | EPI2200571  |
| G2d | 29/3/2022 | jungle crow         | Hokkaido  | Hokkaido | H5N1 | A/crow/Hokkaido/0103B065/2022                  | EPI2021940  |
|     | 29/3/2022 | jungle crow         | Hokkaido  | Hokkaido | H5   |                                                |             |
| G2d | 31/3/2022 | jungle crow         | Hokkaido  | Hokkaido | H5N1 | A/crow/Japan/0104P073-3/2022                   | EPI2200576  |
|     | 31/3/2022 | jungle crow         | Iwate     | Iwate    | H5N1 |                                                |             |
| G2d | 31/3/2022 | jungle crow         | Hokkaido  | Hokkaido | H5   | A/crow/Japan/0104P073-4/2022                   | EPI2200578  |

|     |           |                           |          |          |      |                                                 |             |
|-----|-----------|---------------------------|----------|----------|------|-------------------------------------------------|-------------|
| G2d | 1/4/2022  | jungle crow               | Hokkaido | Hokkaido | H5N1 | A/crow/Hokkaido/0103B073/2022                   | EPI2109875  |
| G2d | 2/4/2022  | jungle crow               | Hokkaido | Hokkaido | H5N1 | A/jungle_crow/Hokkaido/0103B075T/2022           | EPI18720851 |
| G2d | 4/4/2022  | jungle crow               | Hokkaido | Hokkaido | H5N1 | A/jungle_crow/Hokkaido/0103B077T/2022           | EPI18720815 |
| G2d | 4/4/2022  | jungle crow               | Hokkaido | Hokkaido | H5N1 | A/jungle_crow/Hokkaido/0103B081T/2022           | EPI18720823 |
| G2d | 4/4/2022  | jungle crow               | Hokkaido | Hokkaido | H5N1 | A/jungle_crow/Hokkaido/20220404002E/2022        | EPI18720860 |
| G2d | 4/4/2022  | jungle crow               | Hokkaido | Hokkaido | H5N1 | A/jungle_crow/Hokkaido/0103B079T/2022           | EPI18720819 |
| G2d | 5/4/2022  | jungle crow               | Hokkaido | Hokkaido | H5N1 | A/jungle_crow/Hokkaido/0103B083T/2022           | EPI18720825 |
| G2d | 6/4/2022  | jungle crow               | Hokkaido | Hokkaido | H5   | A/jungle_crow/Japan/0304I001/2022               | EPI2363110  |
|     | 6/4/2022  | jungle crow               | Hokkaido | Hokkaido | H5   |                                                 |             |
|     | 6/4/2022  | jungle crow               | Hokkaido | Hokkaido | H5   |                                                 |             |
|     | 8/4/2022  | jungle crow               | Hokkaido | Hokkaido | H5N1 |                                                 |             |
|     | 8/4/2022  | jungle crow               | Hokkaido | Hokkaido | H5N1 |                                                 |             |
|     | 9/4/2022  | White-tailed eagle        | Hokkaido | Hokkaido | H5   |                                                 |             |
| G2d | 9/4/2022  | jungle crow               | Hokkaido | Hokkaido | H5   | A/jungle_crow/Japan/0104B085/2022               | EPI2363179  |
|     | 9/4/2022  | jungle crow               | Hokkaido | Hokkaido | H5N1 |                                                 |             |
| G2d | 9/4/2022  | jungle crow               | Hokkaido | Hokkaido | H5N1 | A/jungle_crow/Hokkaido/0104Q081T/2022           | EPI18720827 |
|     | 9/4/2022  | jungle crow               | Hokkaido | Hokkaido | H5N1 |                                                 |             |
|     | 9/4/2022  | White-tailed eagle        | Hokkaido | Hokkaido | H5   |                                                 |             |
|     | 11/4/2022 | jungle crow, carrion crow | Hokkaido | Hokkaido | H5N1 |                                                 |             |
|     | 12/4/2022 | jungle crow               | Hokkaido | Hokkaido | H5   |                                                 |             |
|     | 12/4/2022 | Mountain hawk eagle       | Hokkaido | Hokkaido | H5N1 |                                                 |             |
|     | 13/4/2022 | jungle crow               | Hokkaido | Hokkaido | H5N1 |                                                 |             |
|     | 15/4/2022 | White-tailed eagle        | Hokkaido | Hokkaido | H5N1 |                                                 |             |
|     | 15/4/2022 | White-tailed eagle        | Hokkaido | Hokkaido | H5   |                                                 |             |
|     | 15/4/2022 | Bean goose                | Hokkaido | Hokkaido | H5N1 |                                                 |             |
| G2d | 18/4/2022 | White-tailed eagle        | Hokkaido | Hokkaido | H5N1 | A/white-tailed_eagle/Hokkaido/20220418002T/2022 | EPI18720864 |
| G2d | 19/4/2022 | jungle crow               | Hokkaido | Hokkaido | H5N1 | A/jungle_crow/Japan/0504F001/2022               | EPI2363229  |
|     | 19/4/2022 | White-tailed eagle        | Hokkaido | Hokkaido | H5   |                                                 |             |
|     | 20/4/2022 | jungle crow               | Hokkaido | Hokkaido | H5N1 |                                                 |             |
|     | 20/4/2022 | Mountain hawk eagle       | Hokkaido | Hokkaido | H5N1 |                                                 |             |
|     | 22/4/2022 | jungle crow               | Hokkaido | Hokkaido | H5N1 |                                                 |             |
| G2d | 25/4/2022 | jungle crow               | Hokkaido | Hokkaido | H5N1 | A/jungle_crow/Hokkaido/0104Q082T/2022_H5N1      | EPI18720858 |
| G2d | 25/4/2022 | White-tailed eagle        | Hokkaido | Hokkaido | H5   | A/white-tailed_eagle/Hokkaido/20220426001/2022  | EPI2200580  |
|     | 26/4/2022 | White-tailed eagle        | Hokkaido | Hokkaido | H5   |                                                 |             |

|     |           |                    |          |          |      |                                     |            |
|-----|-----------|--------------------|----------|----------|------|-------------------------------------|------------|
| G2d | 28/4/2022 | jungle crow        | Hokkaido | Hokkaido | H5   | A/jungle crow/Japan/0104B087/2022   | EPI2363312 |
| G2d | 29/4/2022 | black kite         | Hokkaido | Hokkaido | H5   | A/black kite/Hokkaido/0104P081/2022 | EPI2200581 |
|     | 6/5/2022  | White-tailed eagle | Hokkaido | Hokkaido | H5   |                                     |            |
|     | 6/5/2022  | White-tailed eagle | Hokkaido | Hokkaido | H5   |                                     |            |
|     | 14/5/2022 | White-tailed eagle | Hokkaido | Hokkaido | H5N1 |                                     |            |

<sup>a</sup> Strains colored red reported in the previous studies

**Table S2.** Gene constellation of the H5 HPAIVs isolated from poultry in Japan in 2021–2022.

| Genotype | Collection date | Subtype | Representative isolate              | HA | NA | PB2 | PB1 | PA | NP | MP | NS |
|----------|-----------------|---------|-------------------------------------|----|----|-----|-----|----|----|----|----|
| G2a      | 10/11/2021      | H5N8    | A/chicken/Akita/1T/2021_H5N8        |    |    |     |     |    |    |    |    |
| G2a      | 15/11/2021      | H5N8    | A/chicken/Kagoshima/B1C/2021_H5N8   |    |    |     |     |    |    |    |    |
| G2b      | 13/11/2021      | H5N1    | A/chicken/Kagoshima/21A1T/2021_H5N1 |    |    |     |     |    |    |    |    |
| G2b      | 17/11/2021      | H5N1    | A/chicken/Hyogo/1T/2021_H5N1        |    |    |     |     |    |    |    |    |
| G2b      | 3/12/2021       | H5N1    | A/chicken/Kumamoto/21A4C/2021_H5N1  |    |    |     |     |    |    |    |    |
| G2b      | 5/12/2021       | H5N1    | A/chicken/Chiba/21A1T/2021_H5N1     |    |    |     |     |    |    |    |    |
| G2b      | 7/12/2021       | H5N1    | A/chicken/Saitama/21A2T/2021_H5N1   |    |    |     |     |    |    |    |    |
| G2b      | 7/12/2021       | H5N1    | A/chicken/Hiroshima/21A3T/2021_H5N1 |    |    |     |     |    |    |    |    |
| G2b      | 12/12/2021      | H5N1    | A/chicken/Aomori/21A1T/2021_H5N1    |    |    |     |     |    |    |    |    |
| G2b      | 31/12/2021      | H5N1    | A/chicken/Ehime/21A2C/2021_H5N1     |    |    |     |     |    |    |    |    |
| G2b      | 4/1/2022        | H5N1    | A/chicken/Ehime/21B2T/2022_H5N1     |    |    |     |     |    |    |    |    |
| G2b      | 4/1/2022        | H5N1    | A/chicken/Ehime/21C5T/2022_H5N1     |    |    |     |     |    |    |    |    |
| G2b      | 13/1/2022       | H5N1    | A/chicken/Kagoshima/21C2T/2022_H5N1 |    |    |     |     |    |    |    |    |
| G2b      | 19/1/2022       | H5N1    | A/chicken/Chiba/21B2T/2022_H5N1     |    |    |     |     |    |    |    |    |
| G2b      | 26/1/2022       | H5N1    | A/duck/Chiba/21C1T/2022_H5N1        |    |    |     |     |    |    |    |    |
| G2b      | 13/5/2022       | H5N1    | A/chicken/Hokkaido/21D1T/2022_H5N1  |    |    |     |     |    |    |    |    |
| G2d      | 11/2/2022       | H5N1    | A/chicken/Iwate/21A1T/2022_H5N1     |    |    |     |     |    |    |    |    |
| G2d      | 24/3/2022       | H5N1    | A/chicken/Miyagi/21A11T/2022_H5N1   |    |    |     |     |    |    |    |    |
| G2d      | 7/4/2022        | H5N1    | A/chicken/Aomori/21B3T/2022_H5N1    |    |    |     |     |    |    |    |    |
| G2d      | 14/4/2022       | H5N1    | A/chicken/Aomori/21C14T/2022_H5N1   |    |    |     |     |    |    |    |    |
| G2d      | 15/4/2022       | H5N1    | A/chicken/Hokkaido/21A4T/2022_H5N1  |    |    |     |     |    |    |    |    |
| G2d      | 16/4/2022       | H5N1    | A/emu/Hokkaido/21B11T/2022_H5N1     |    |    |     |     |    |    |    |    |
| G2d      | 18/4/2022       | H5N1    | A/chicken/Akita/21B1T/2022_H5N1     |    |    |     |     |    |    |    |    |
| G2d      | 25/4/2022       | H5N1    | A/emu/Hokkaido/21C1T/2022_H5N1      |    |    |     |     |    |    |    |    |
| G2d      | 11/5/2022       | H5N1    | A/emu/Iwate/21B1T/2022_H5N1         |    |    |     |     |    |    |    |    |



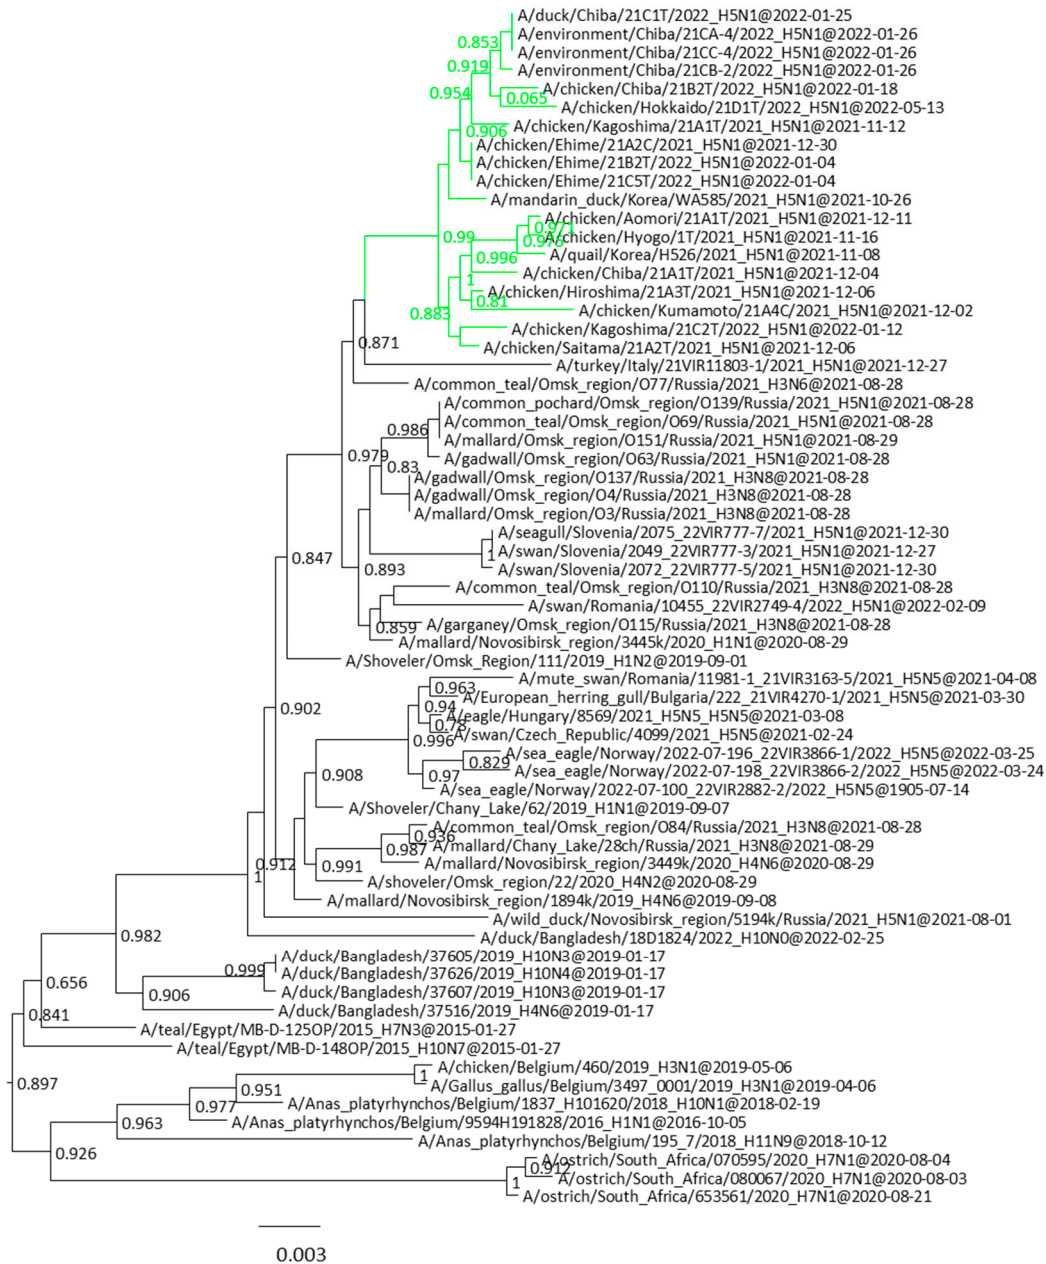

**Figure S1.** Section of the maximum likelihood tree based on PB2 genes. G2b H5 HPAIVs isolated in this study are green. Fast-global bootstrap values of  $\geq 0.60$  are shown.

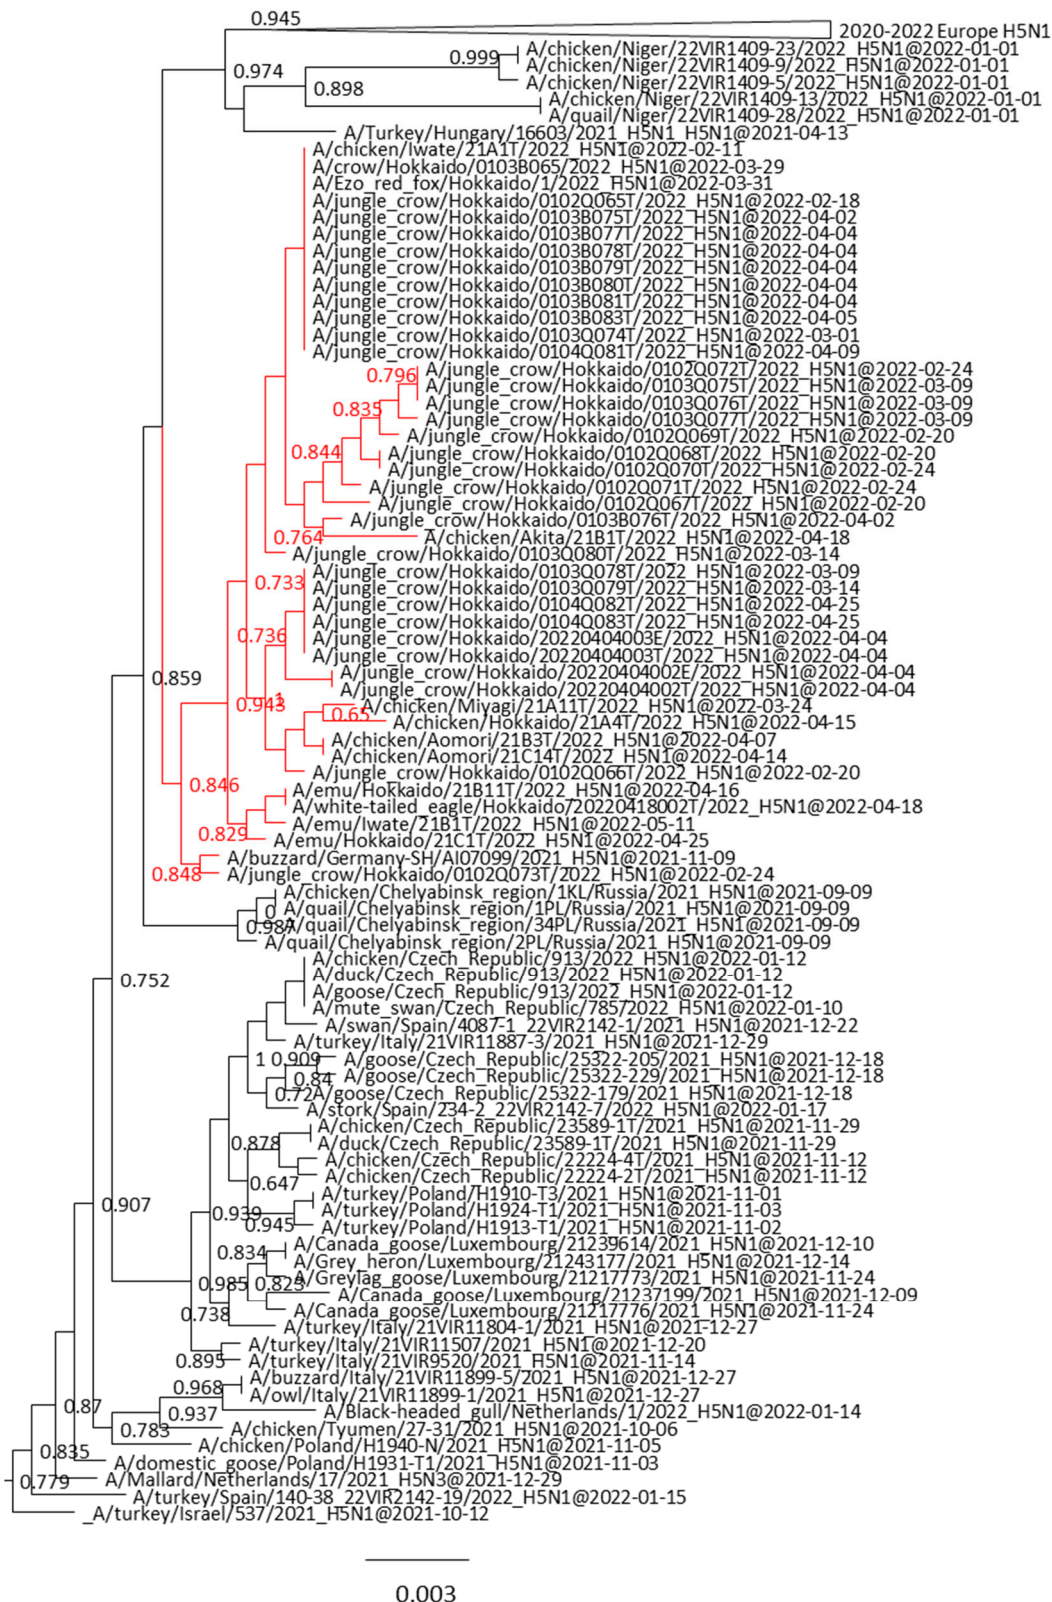

**Figure S2.** Section of the maximum likelihood tree based on PB2 genes. G2d H5 HPAIVs isolated in this study are red. Fast-global bootstrap values of  $\geq 0.60$  are shown.







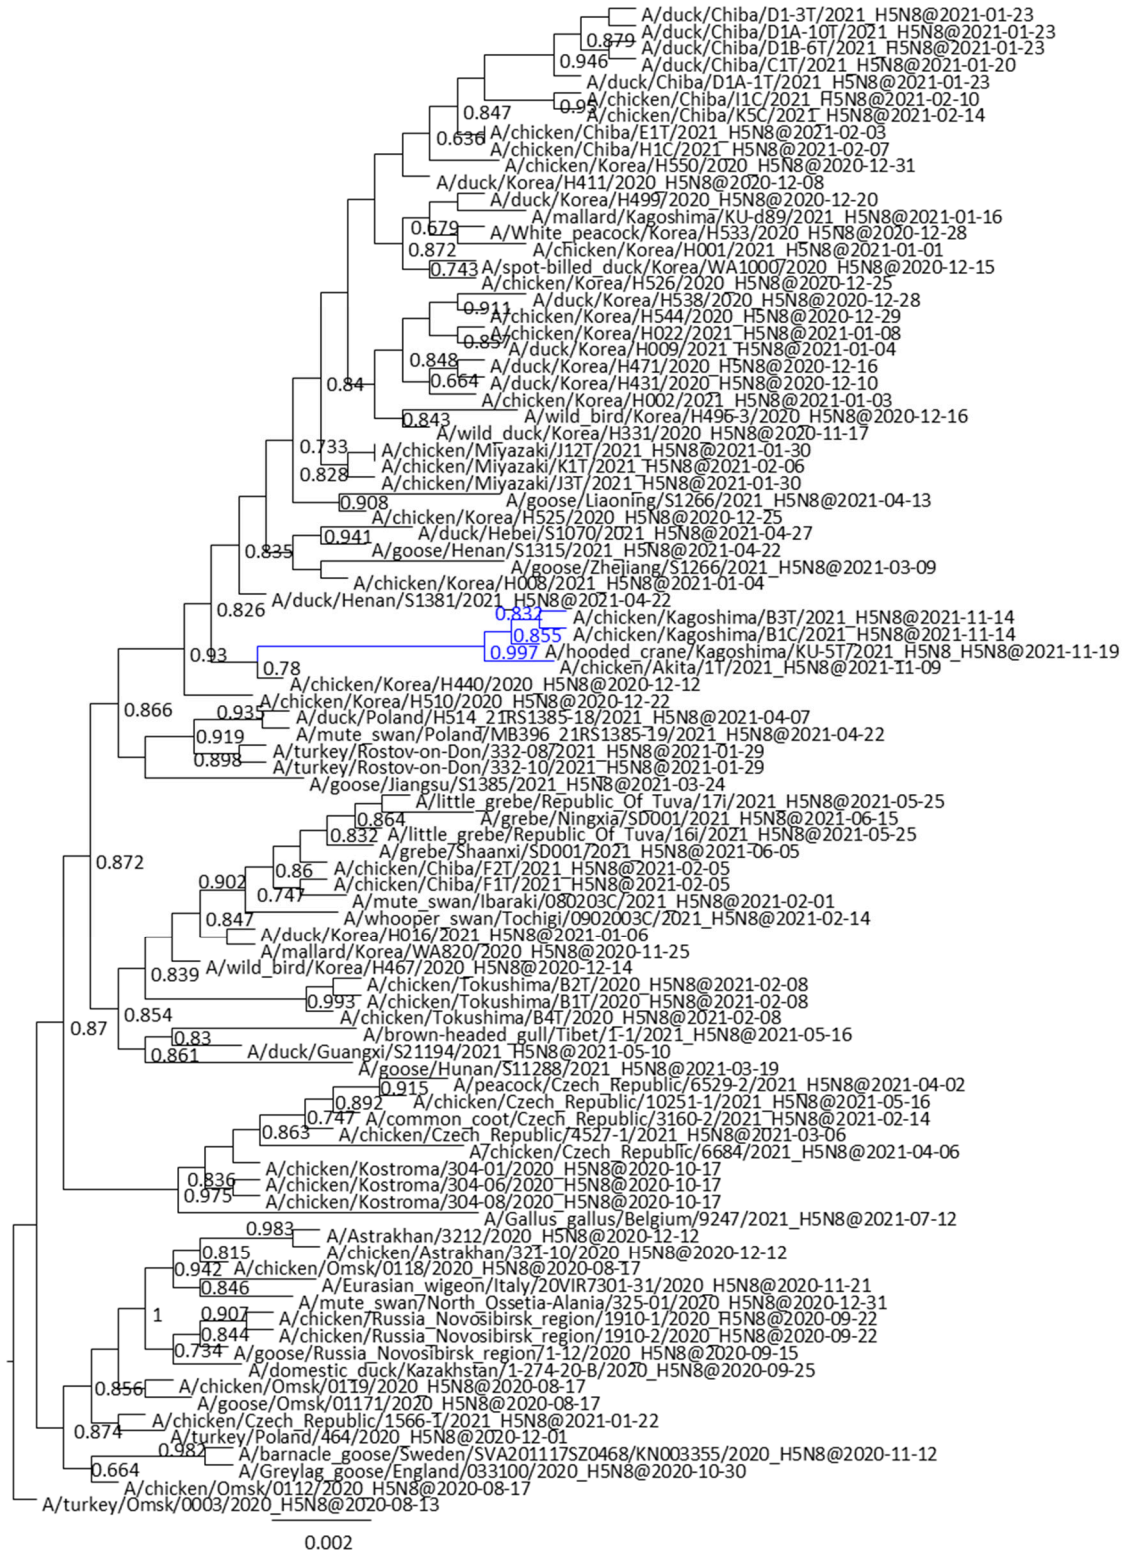

**Figure S5.** Section of the maximum likelihood tree based on PB1 genes. G2a H5 HPAIVs isolated in this study are blue. Fast-global bootstrap values of  $\geq 0.60$  are shown.

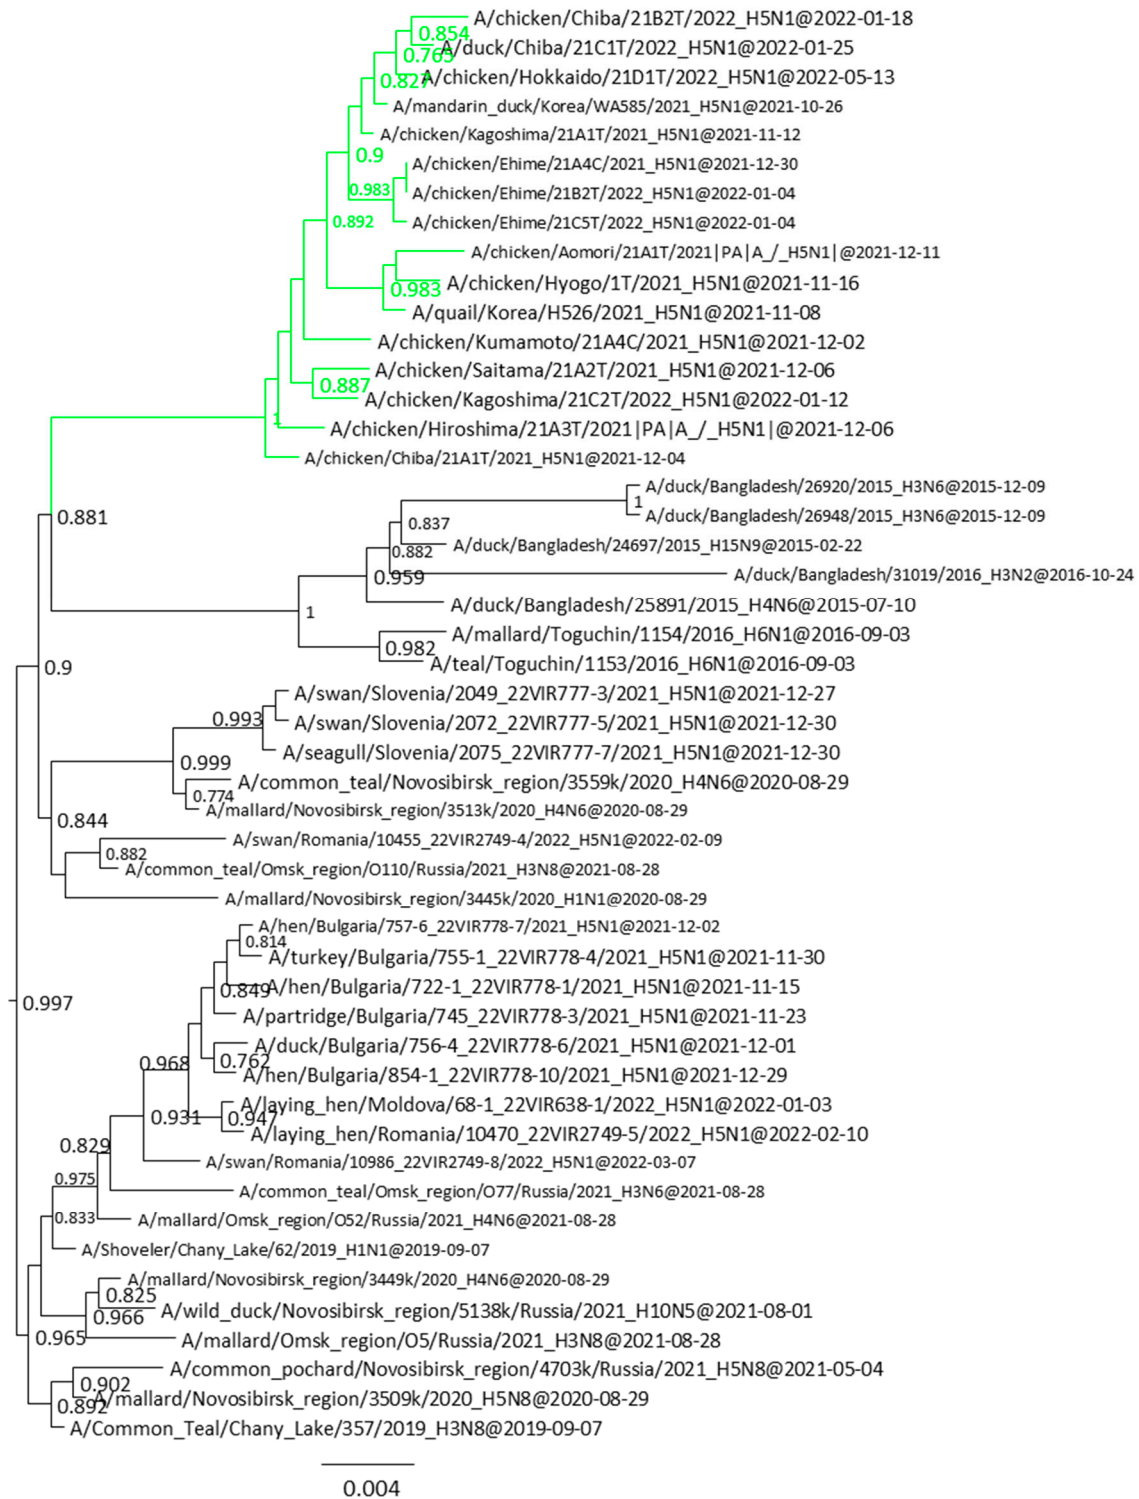

**Figure S6.** Section of the maximum likelihood tree based on PA genes. G2b H5 HPAIVs isolated in this study are blue. Fast-global bootstrap values of  $\geq 0.60$  are shown.



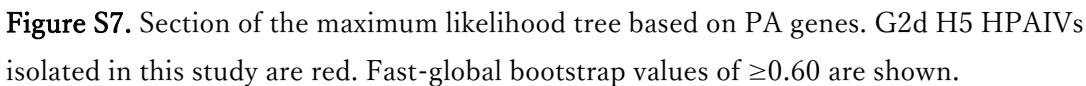

**Figure S7.** Section of the maximum likelihood tree based on PA genes. G2d H5 HPAIVs isolated in this study are red. Fast-global bootstrap values of  $\geq 0.60$  are shown.

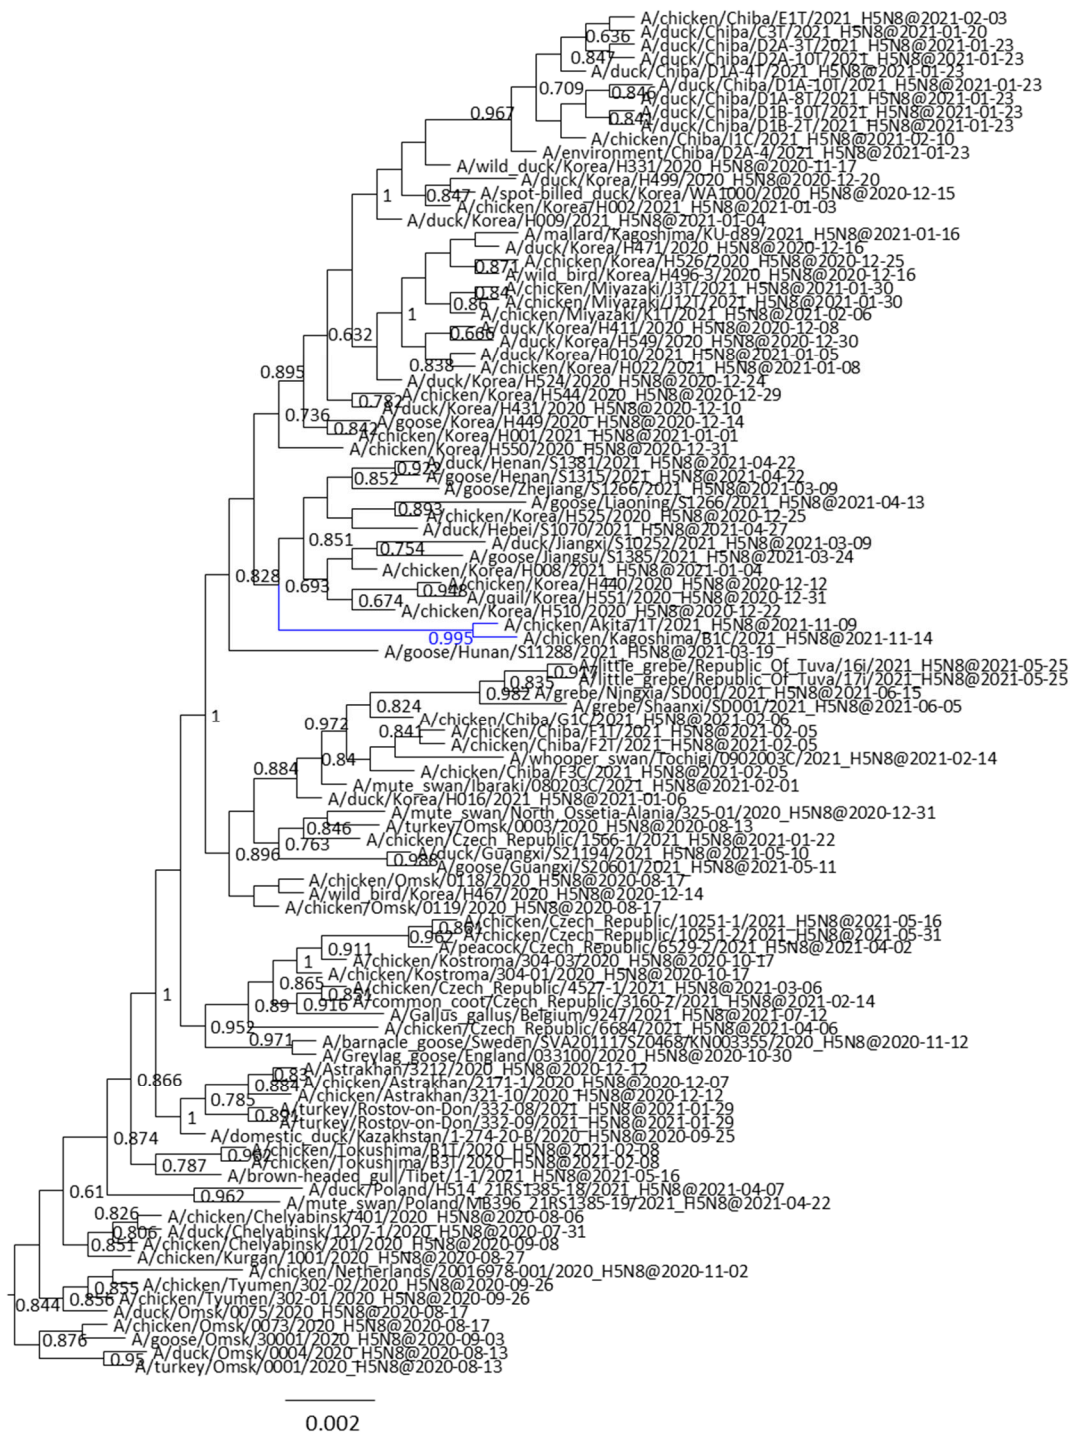

**Figure S8.** Section of the maximum likelihood tree based on PA genes. G2a H5 HPAIVs isolated in this study are blue. Fast-global bootstrap values of  $\geq 0.60$  are shown.



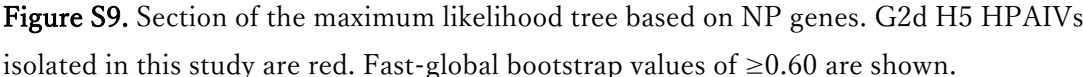

**Figure S9.** Section of the maximum likelihood tree based on NP genes. G2d H5 HPAIVs isolated in this study are red. Fast-global bootstrap values of  $\geq 0.60$  are shown.

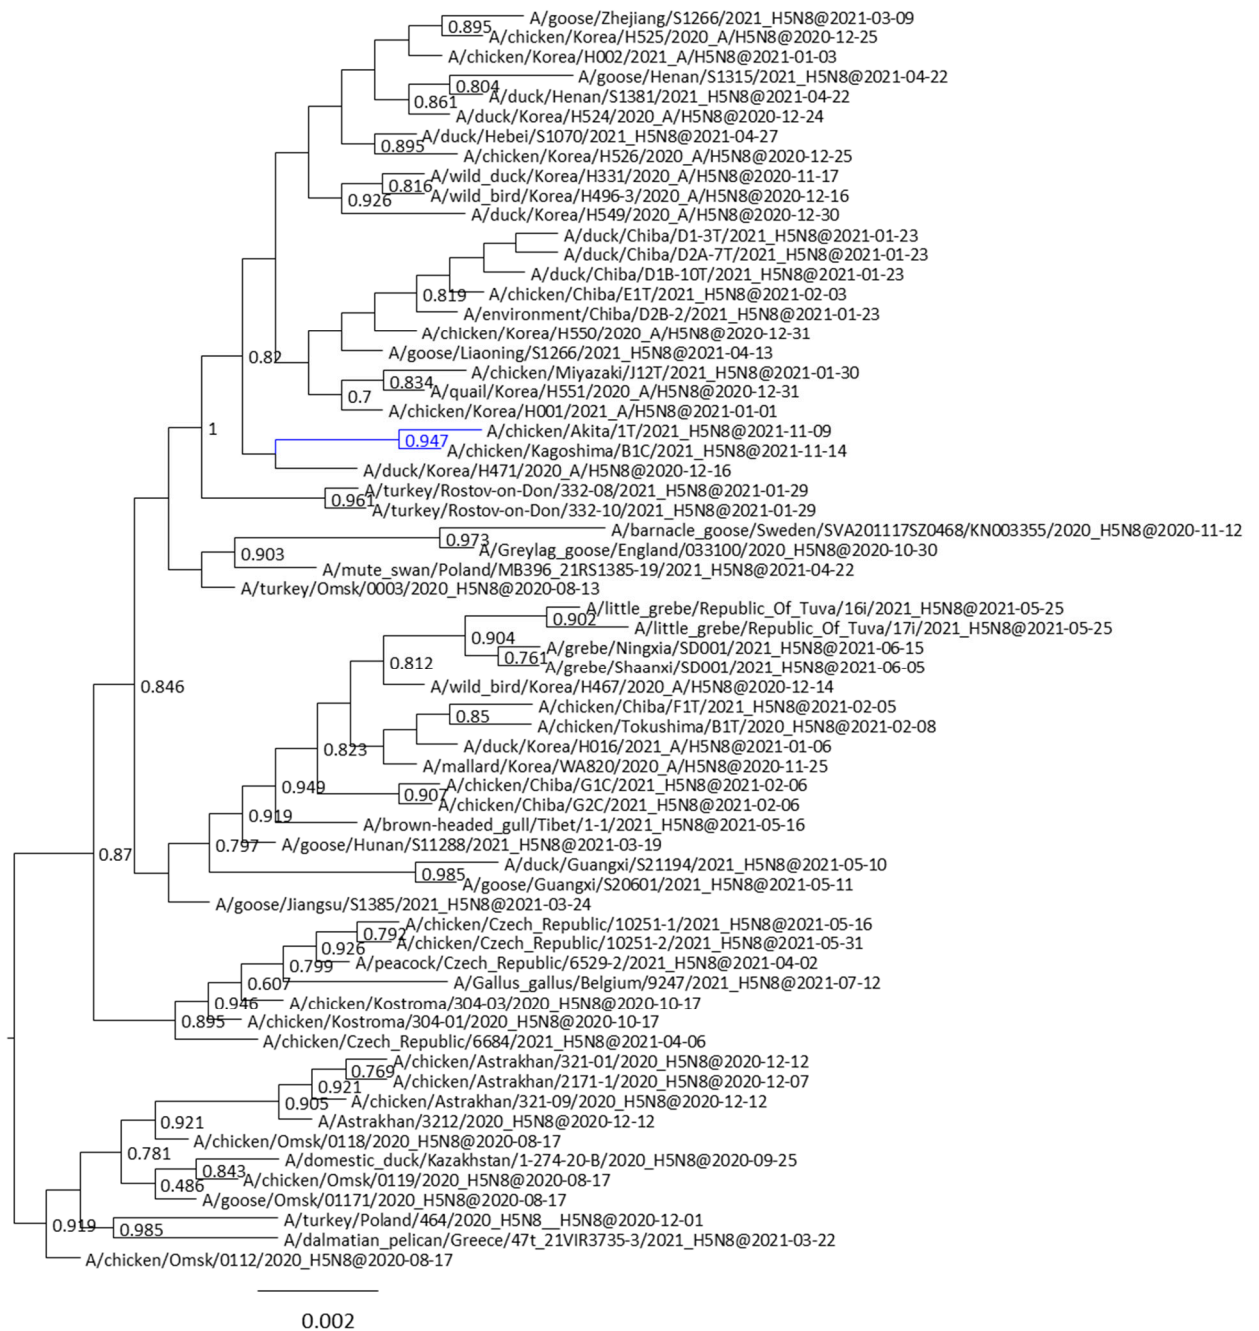

**Figure S10.** Section of the maximum likelihood tree based on NP genes. G2a H5 HPAIVs isolated in this study are blue. Fast-global bootstrap values of  $\geq 0.60$  are shown.

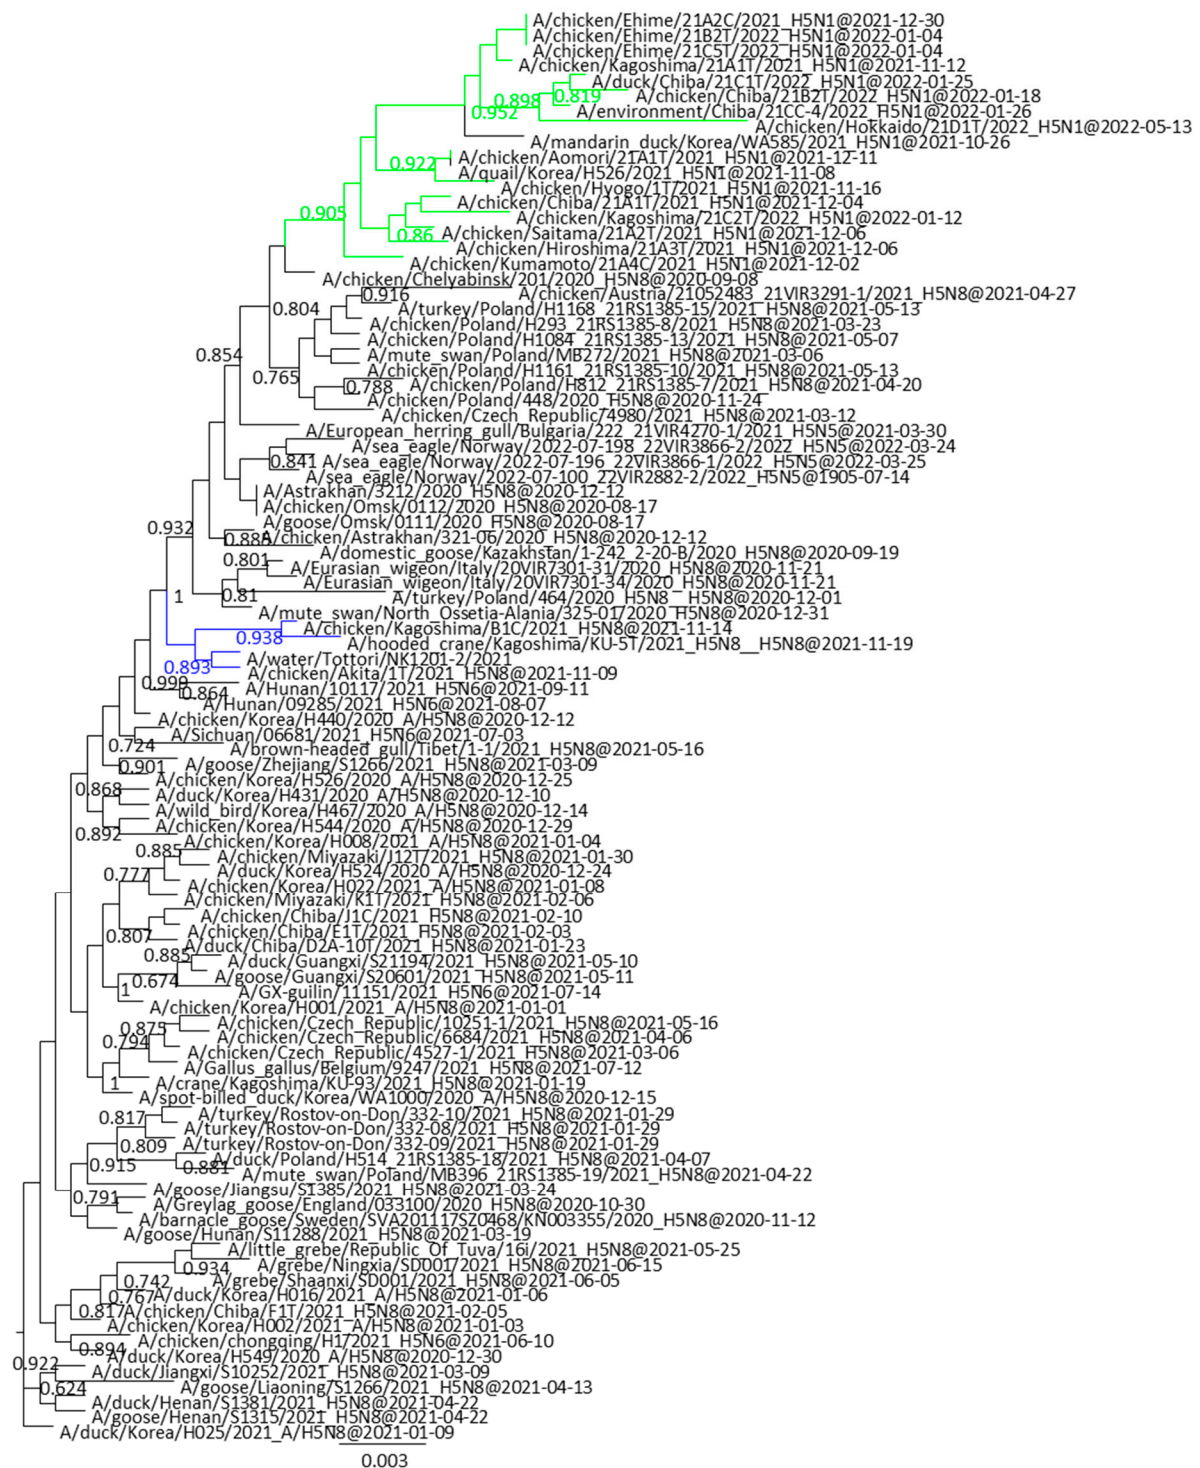

**Figure S11.** Section of the maximum likelihood tree based on NP genes. G2a and G2b H5 HPAIVs isolated in this study are blue and green, respectively. Fast-global bootstrap values of  $\geq 0.60$  are shown.



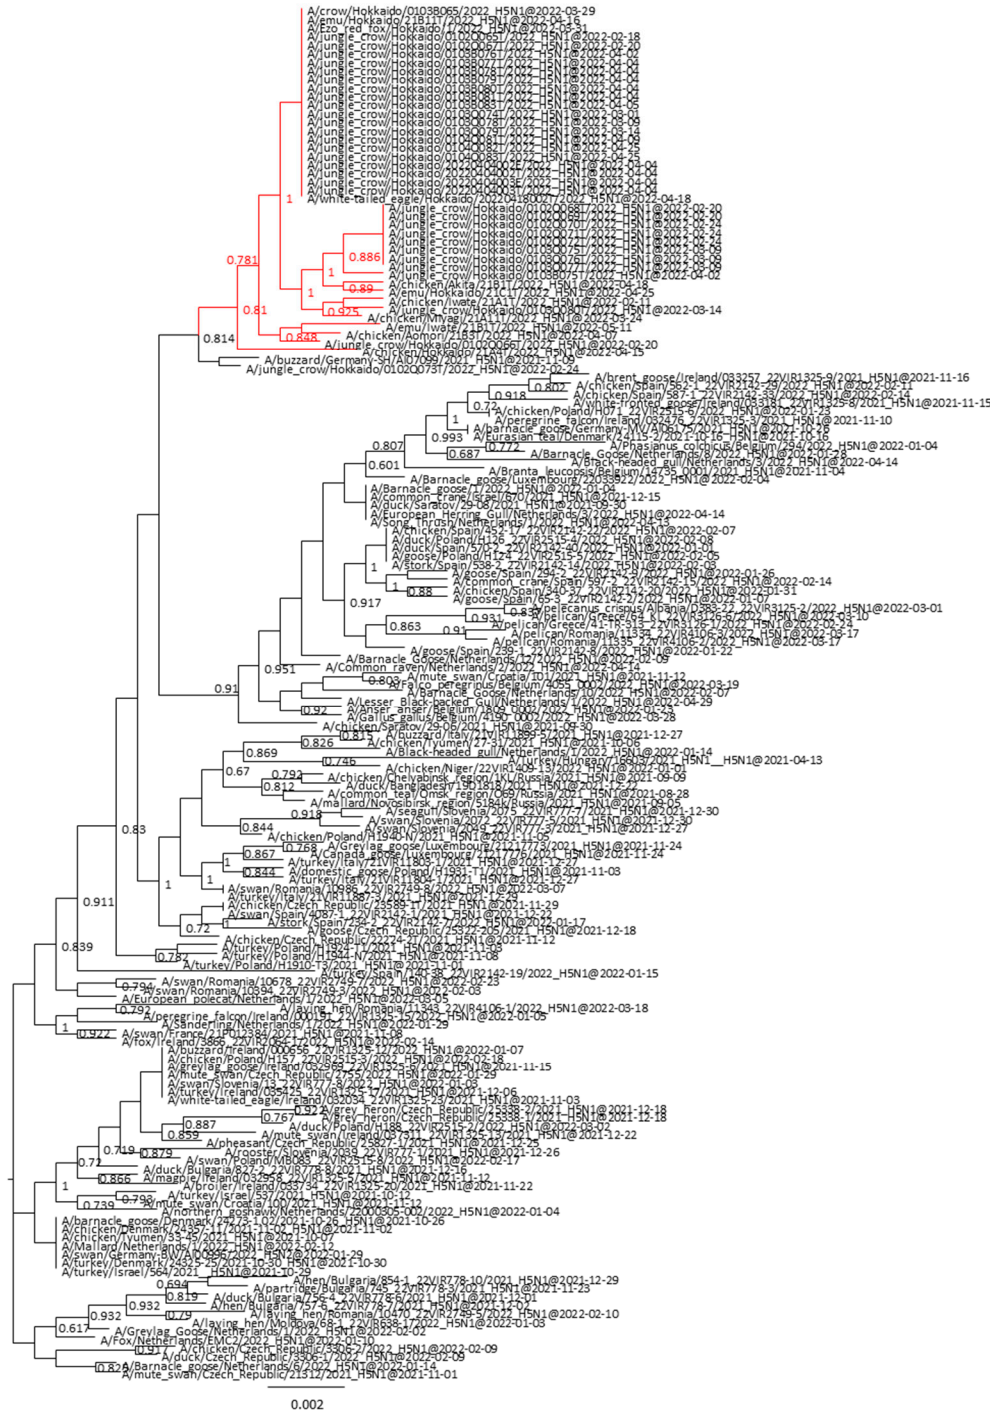

**Figure S12.** Section of the maximum likelihood tree based on MP genes. G2d H5 HPAIVs isolated in this study are red. Fast-global bootstrap values of  $\geq 0.60$  are shown.

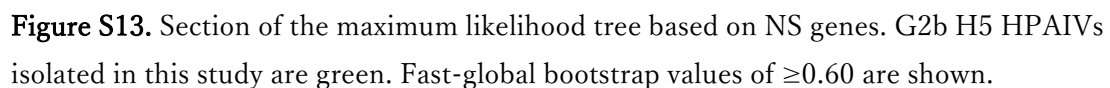

**Figure S13.** Section of the maximum likelihood tree based on NS genes. G2b H5 HPAIVs isolated in this study are green. Fast-global bootstrap values of  $\geq 0.60$  are shown.

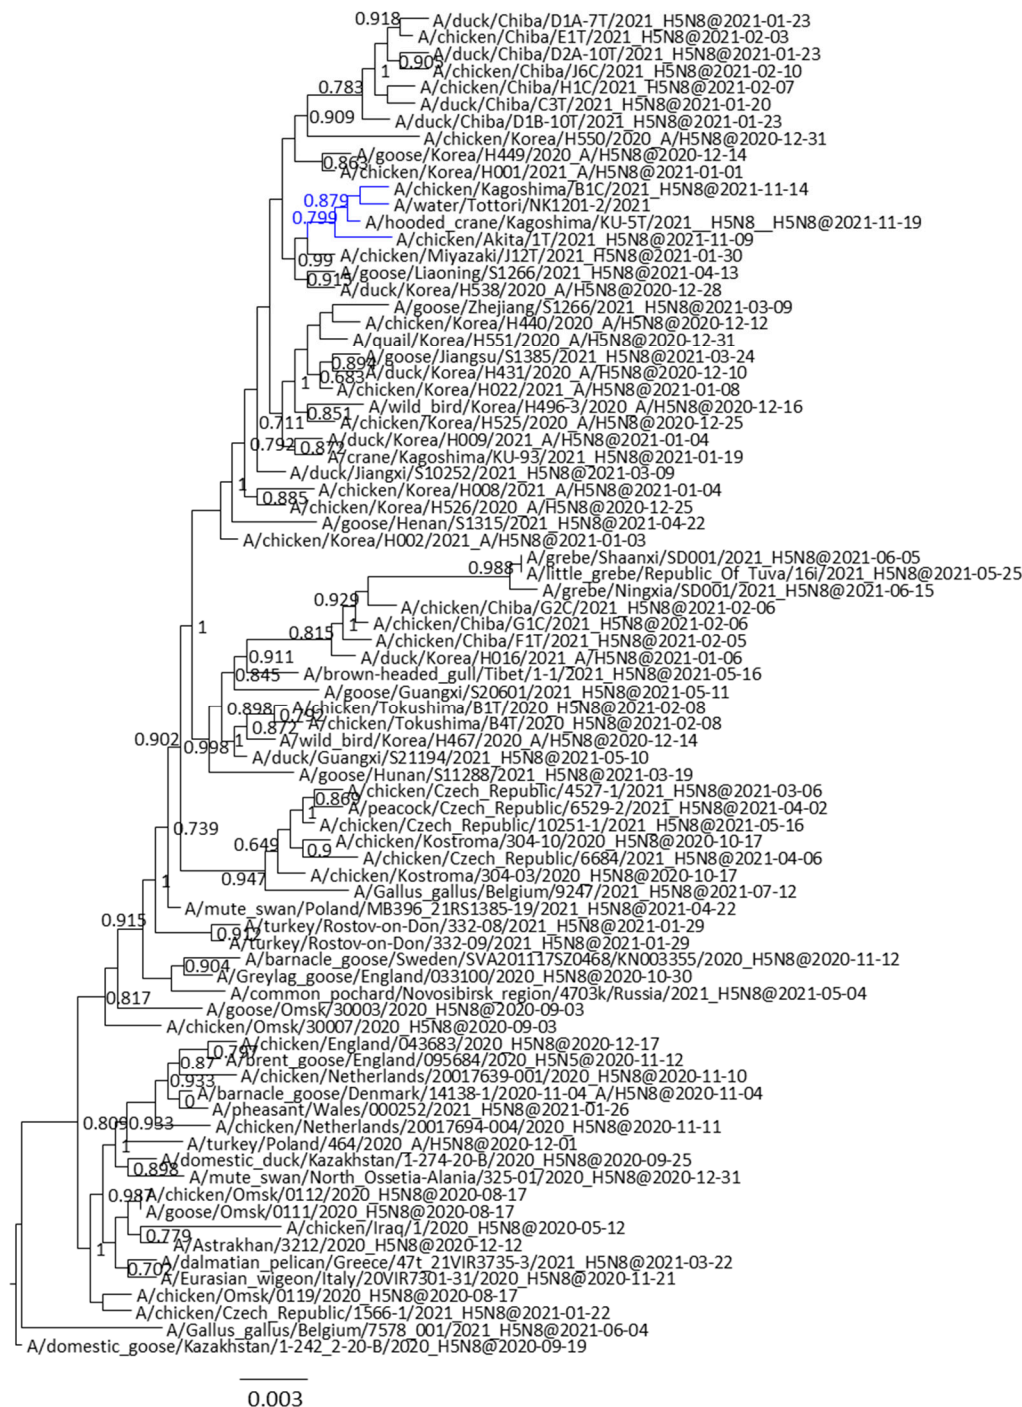

**Figure S14.** Section of the maximum likelihood tree based on NS genes. G2a H5 HPAIVs isolated in this study are blue. Fast-global bootstrap values of  $\geq 0.60$  are shown.



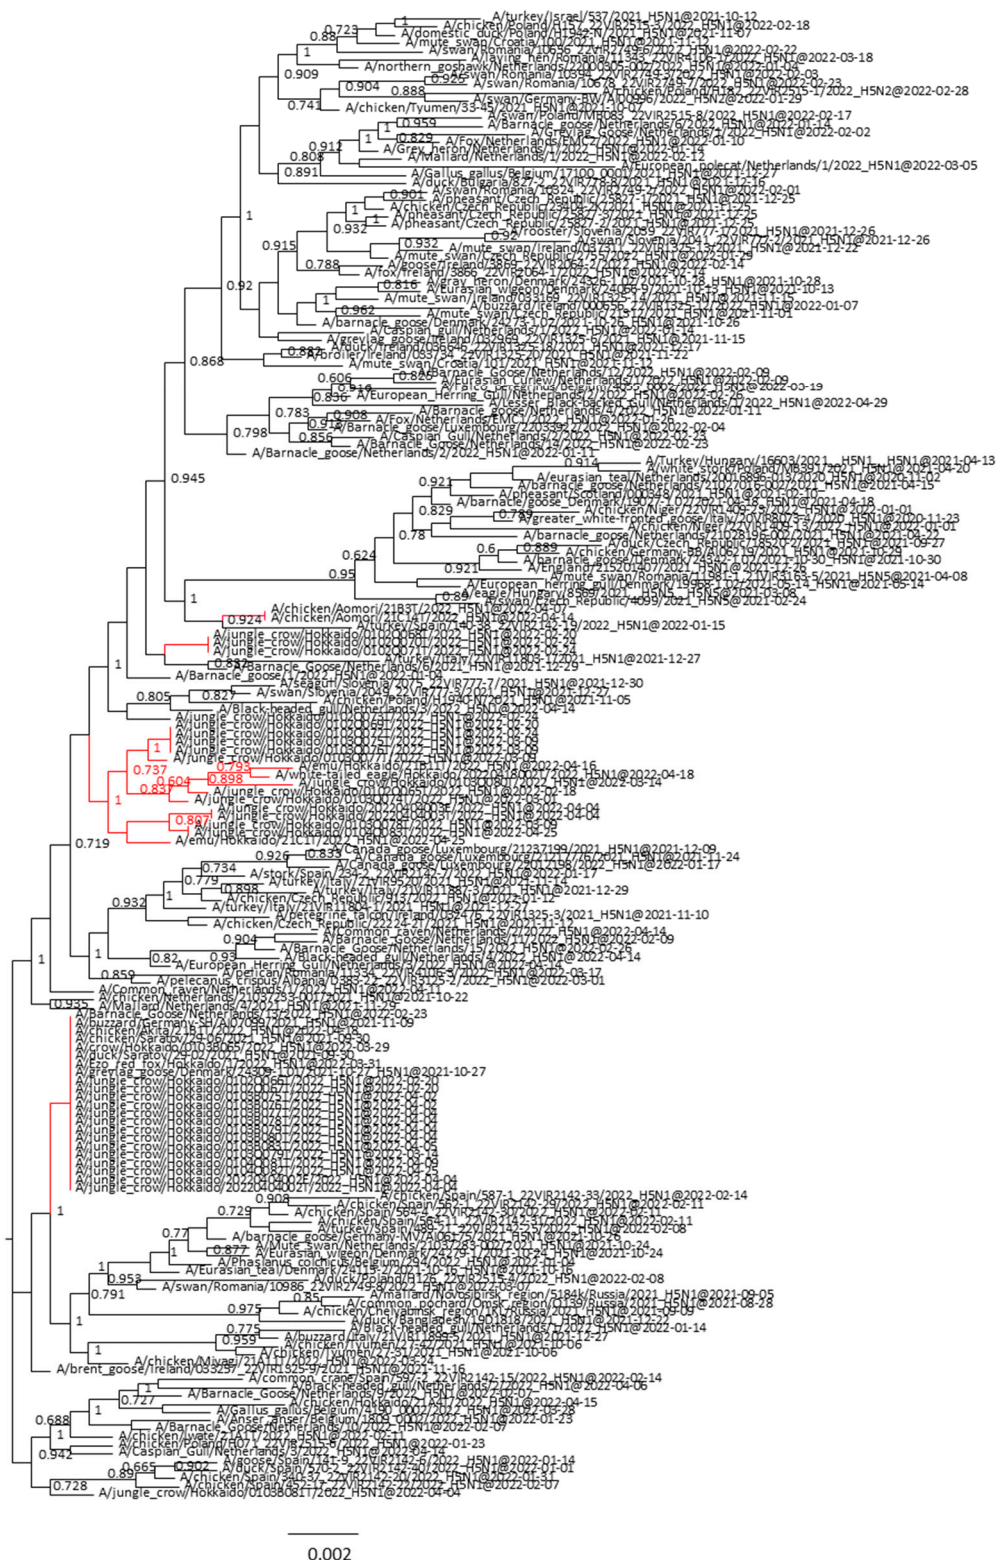

**Figure S15.** Section of the maximum likelihood tree based on NS genes. G2d H5 HPAIVs isolated in this study are red. Fast-global bootstrap values of  $\geq 0.60$  are shown.
